# Supplementary material for: A GRFa2/Prop1/Stem (GPS) Cell Niche in the Pituitary
Source: PubMed Central journal article supplement (PMC2654029; doi:10.1371/journal.pone.0004815), 2009-03-13
Supplement: pone.0004815.s002.pdf [file pone.0004815.s002.pdf]

**A**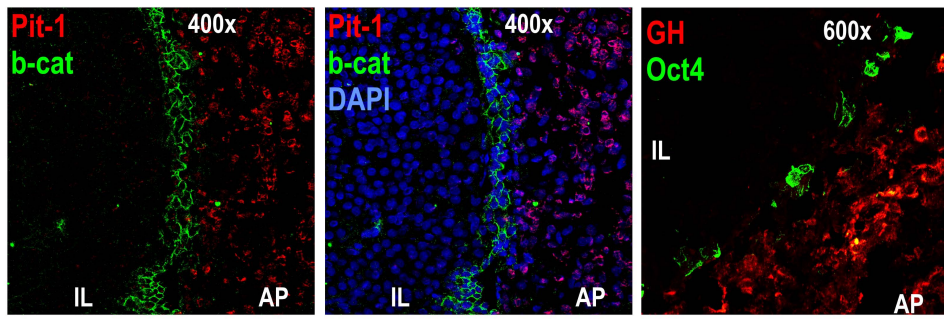**B**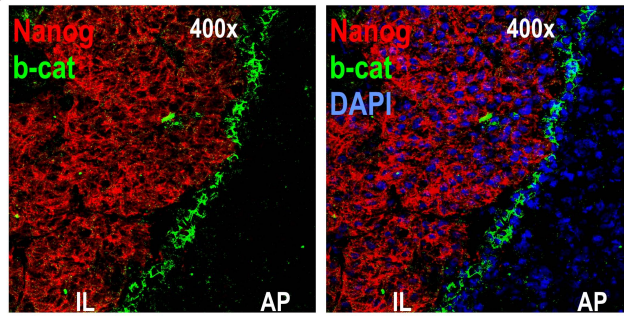**C**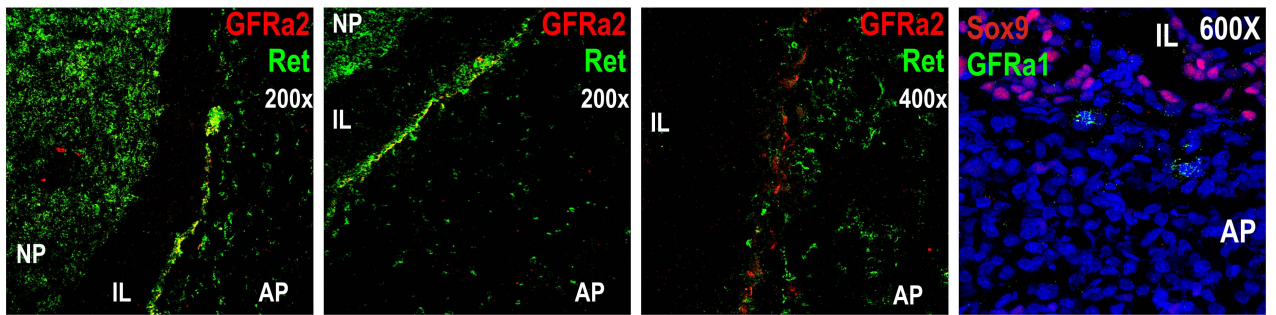**D**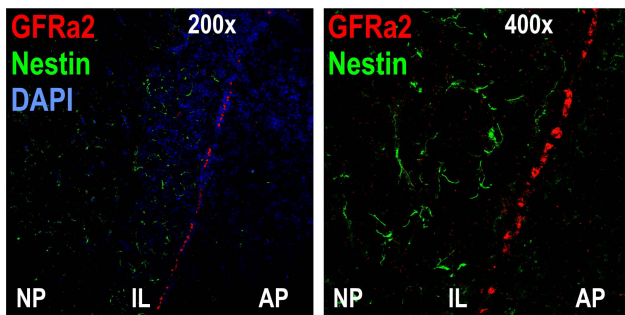**F**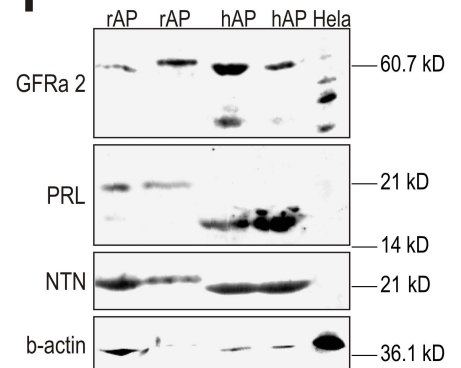**E**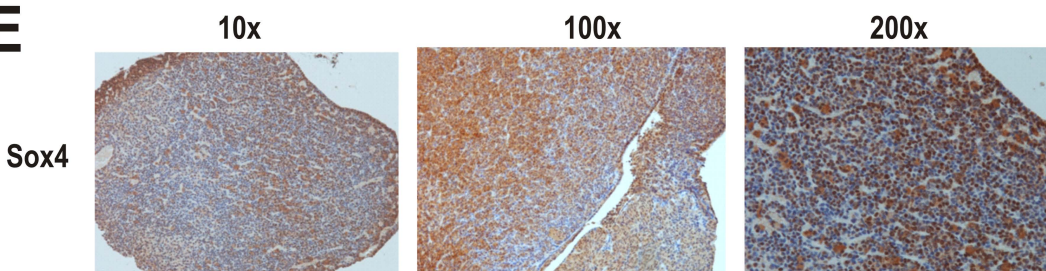

Supplementary Figure 2
