# Supplementary material for: A GRFa2/Prop1/Stem (GPS) Cell Niche in the Pituitary
Source: PubMed Central journal article supplement (PMC2654029; doi:10.1371/journal.pone.0004815), 2009-03-13

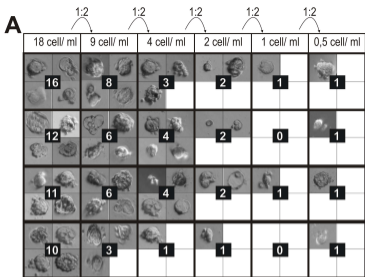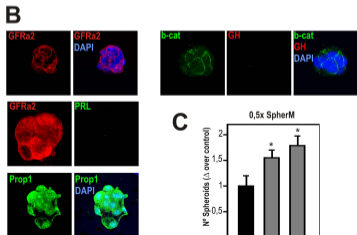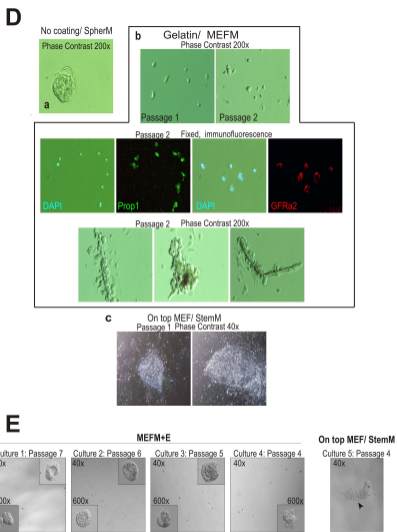

Supplement: pone.0004815.s003.pdf [file pone.0004815.s003.pdf]
